# Supplementary material
Source: bioRxiv or medRxiv preprint supplement (https://www.biorxiv.org/highwire/filestream/56895/field_highwire_adjunct_files/0/188078-1.pdf)
Supplement: Supplementary file [file 188078-1.pdf]

# Appendix S3: comparative study of isoRelate and hmmIBD

## Methods

### Summary of files and variables used

The following summarizes results generated from a comparative study of hmmIBD and isoRelate (Henden L, et al. BioRxiv. 2016). Analyses were based on data generated by artificial recombination (details below). The steps, data and scripts required to reproduce this study are as follows.

1. Download the `hmmIBD_benchmark` repository from [https://github.com/artaylor85/hmmIBD\\_benchmark](https://github.com/artaylor85/hmmIBD_benchmark) and unzip the `pf3k_data` directory.
2. Install hmmIBD following instructions at <https://github.com/glipsnort/hmmIBD/releases> (v2.0.0).
3. Install isoRelate following instructions at <https://github.com/bahlolab/isoRelate/releases> (results here based on v0.1.0 installed Aug 9th 2017).
4. Set working directory to this source file location.
5. Run `Simulate_chimeric_genotypes.R`.
6. Run `Run_isolate_hmmIBD.R`.
7. Run `Post_process_results.R`.
8. Run/knit this file.

### Simulation of artificially recombined data

We used artificially recombined data to compare results generated under hmmIBD and isoRelate to a known truth that was not generated under either model. Artificially recombined data were based on the MalariaGen Pf3k samples, pilot release 5.0 (<https://www.malariagen.net/projects/pf3k>). These data were filtered prior to their use in this comparative study, leaving only single nucleotide polymorphisms (SNPs) in the accessible genome (as defined by Manske M, et al. Nature 2012), and those with a high probability of being monogenomic (as defined by DEploid from Zhu SJ, Almagro-garcia J, Mcvean G. BioRxiv. 2017). The filtered data can be found in `pf3k_data`. Using `Simulate_chimeric_genotypes.R` we:

1. Extracted samples from sites with 100 or more samples (Thies, Kassena, Pursat).
2. For each site, removed multiallelic SNPs (unsupported by isoRelate) and those with minor allele frequency  $\leq 0.01$ , leaving 57307, 41992, 69438 SNPs per sample from Kassena, Pursat, Thies, respectively.
3. Calculated and saved allele frequencies and data sets based on the non recombined data to ensure frequencies were not based on chimeric samples.
4. For each pairwise comparison within a site, calculated the average identity-by-state, IBS (one minus the genome-wide average SNP difference), and plotted.
5. Extracted unrelated pairs (those with IBS  $< 1$  percentile of the empirical IBS distribution).
6. Artificially recombined each unrelated sample pair to create a “chimeric child”. Recombination was simulated by sampling crossover positions (in base pairs) from an exponential distribution with mean equal to the recombination rate (in M/bp) (see `functions.R`).
7. Recorded the parent of each DNA segment in each chimeric child, and plotted the number of crossovers per chromosome averaged over all the chimeric children per site.

### Parameter values used to run the HMMs

For each site, IBD segments between 50 “chimeric children” and each of their two parents were inferred under isoRelate and hmmIBD using the parameter values listed in the table below, some of which differ to the defaults provided in order to more closely match the two methods. Timing experiments were done separately

on the first 50 samples per site (including non-recombined parents and chimeric children), and repeated 3 times on a MacBook Air laptop with 1.7 GHz Intel Core i7 processor.

Table 1: Specified parameter values. NA denotes not applicable. †In isoRelate, the “recombination rate” is a function of distance in Morgans (M). The equivalent fixed rate in M per base pair (bp) for hmmIBD was thus based on the empirical relationship between positions in bp and centimorgans provided in the png\_pedmap data set of the isoRelate package.

| Parameter                            | isoRelate      | hmmIBD        |
|--------------------------------------|----------------|---------------|
| genotyping error                     | 0.001          | 0.001         |
| recombination rate                   | 5.83e-07 M/bp† | 5.83e-07 M/bp |
| minimum no. SNPs per segment         | 0              | NA            |
| minimum length (bp) per segment      | 0              | NA            |
| Minimum marker spacing (bp)          | NA             | 0             |
| Minimum informative sites per genome | NA             | 0             |

## Results

Table 2: Clocktime (sec) per 50 samples

|           | isoRelate | hmmIBD |
|-----------|-----------|--------|
| Kassena 1 | 1710.868  | 70.789 |
| Pursat 1  | 1287.921  | 50.731 |
| Thies 1   | 2108.324  | 77.843 |
| Kassena 2 | 1719.406  | 71.102 |
| Pursat 2  | 1285.698  | 51.404 |
| Thies 2   | 2108.073  | 77.129 |
| Kassena 3 | 1715.745  | 70.887 |
| Pursat 3  | 1289.467  | 52.115 |
| Thies 3   | 2174.474  | 78.257 |

Table 3: CPU time (sec) per 50 samples

|           | isoRelate | hmmIBD |
|-----------|-----------|--------|
| Kassena 1 | 1658.248  | 70.304 |
| Pursat 1  | 1243.584  | 49.188 |
| Thies 1   | 2034.809  | 77.163 |
| Kassena 2 | 1664.926  | 70.682 |
| Pursat 2  | 1241.516  | 50.788 |
| Thies 2   | 2034.305  | 76.684 |
| Kassena 3 | 1662.618  | 70.462 |
| Pursat 3  | 1245.173  | 50.790 |
| Thies 3   | 2086.543  | 77.399 |

Accuracy, sensitivity and specificity were calculated as follows, where for a given pairwise comparison and SNP, a true positive is an IBD observation given an IBD state, and a true negative is a not IBD (nIBD) observation given a nIBD state,

$$\text{Accuracy} = \frac{\sum \text{True positive} + \sum \text{True negative}}{\text{Number of SNPs}}, \quad (1)$$

$$\text{Sensitivity} = \frac{\sum \text{True positive}}{\sum \text{IBD states}}, \quad (2)$$

$$\text{Specificity} = \frac{\sum \text{True negative}}{\sum \text{nIBD states}}. \quad (3)$$

### Kassena

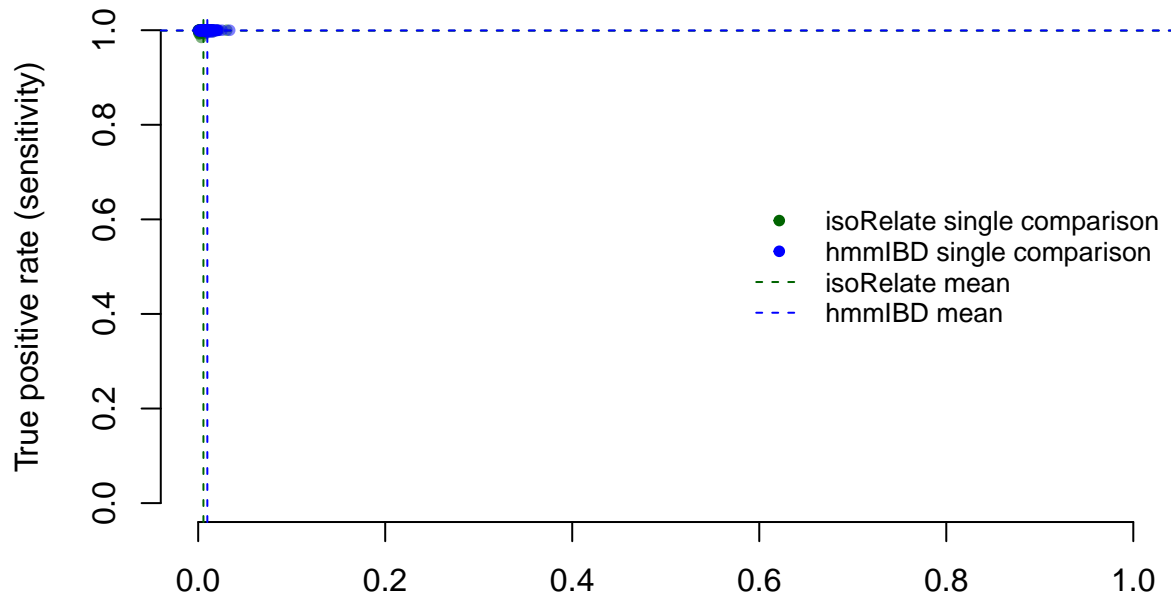

False positive rate (1-specificity)  
 Mean accuracy 0.9968 (isoRelate) 0.9948 (hmmIBD)

### Pursat

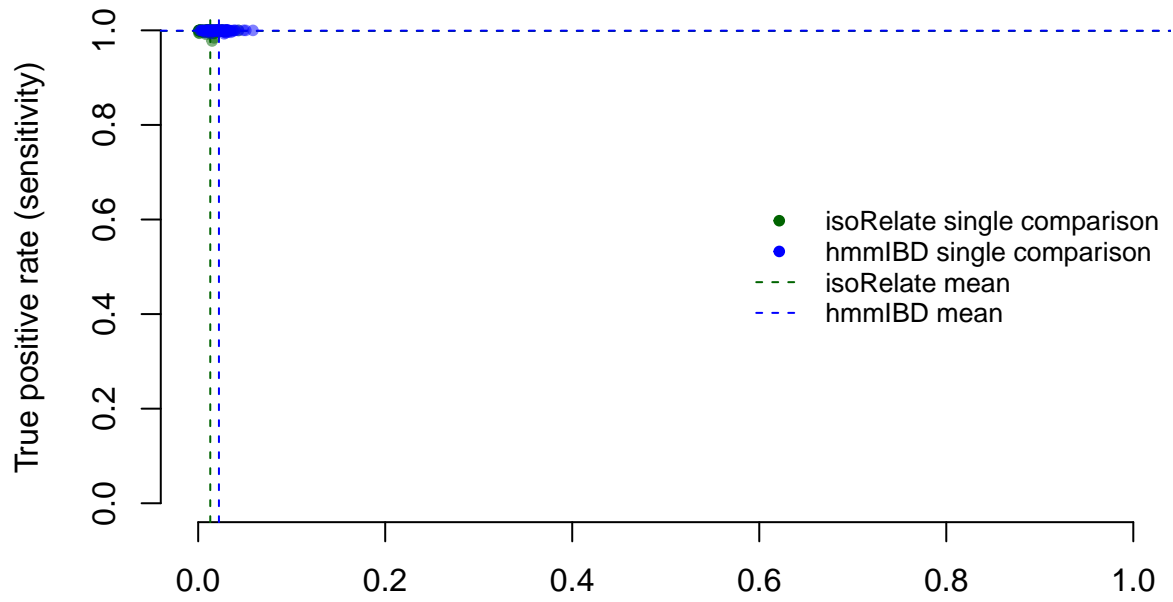

False positive rate (1-specificity)  
Mean accuracy 0.9932 (isoRelate) 0.9887 (hmmlBD)

### Thies

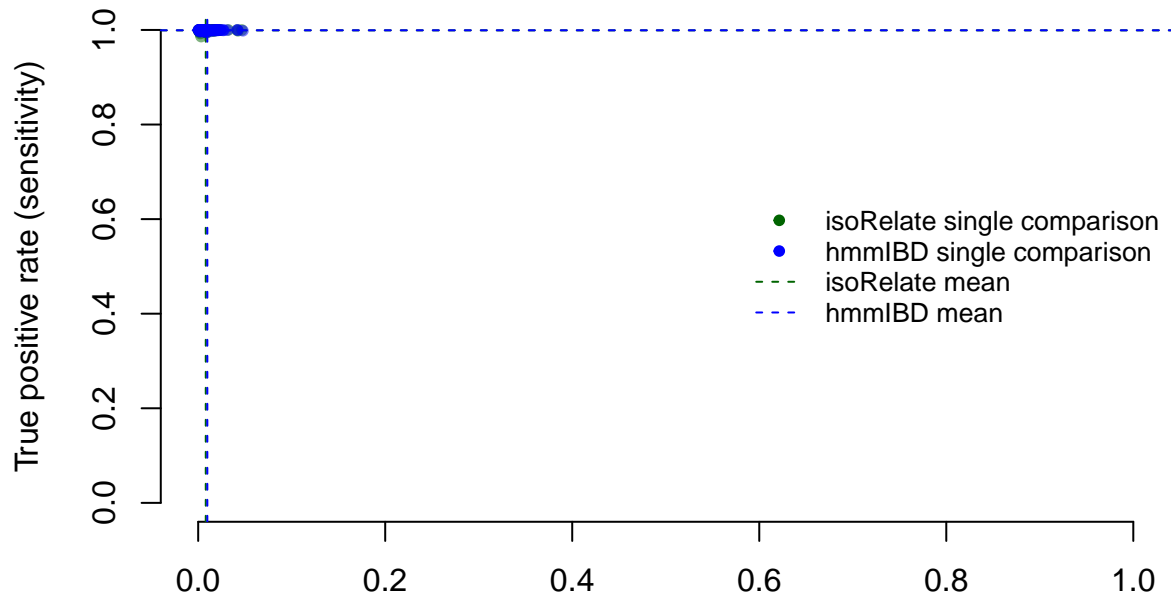

False positive rate (1-specificity)  
Mean accuracy 0.9958 (isoRelate) 0.9948 (hmmlBD)

Illustrative assignment plots for two random pairwise comparison from Kassena

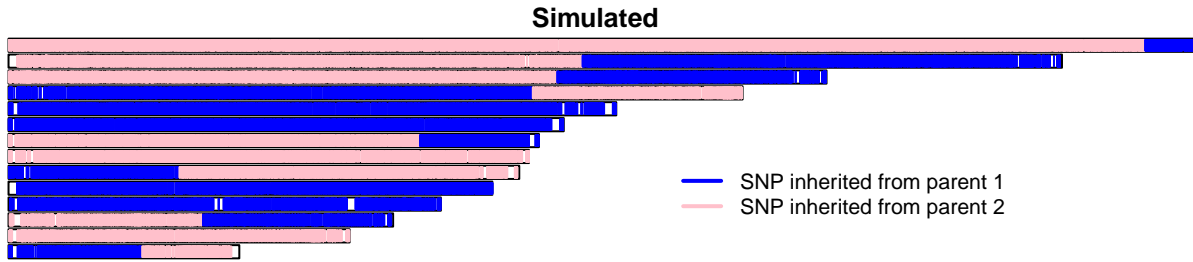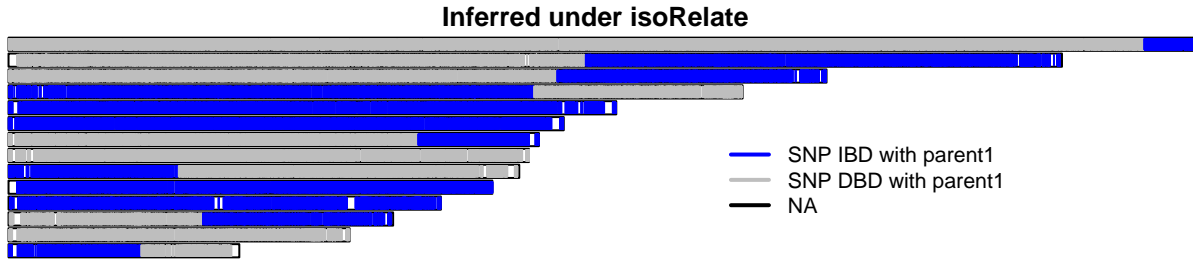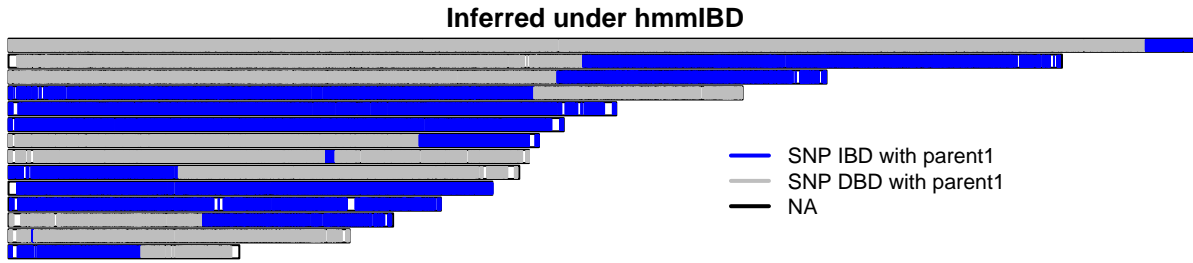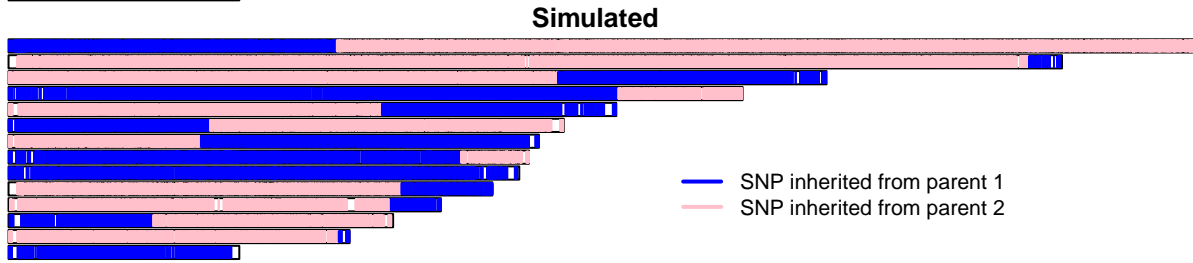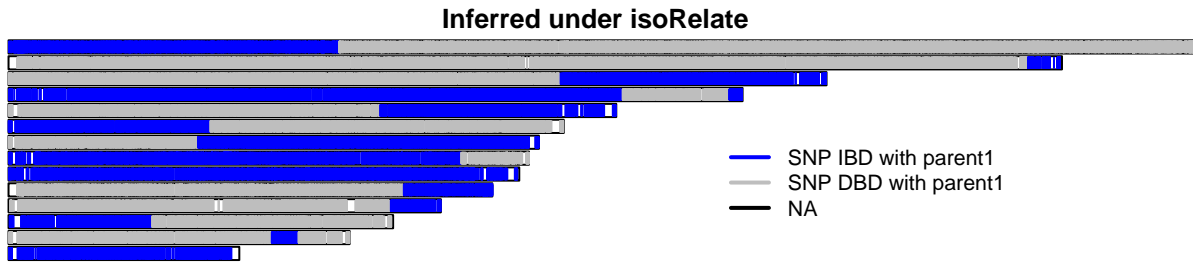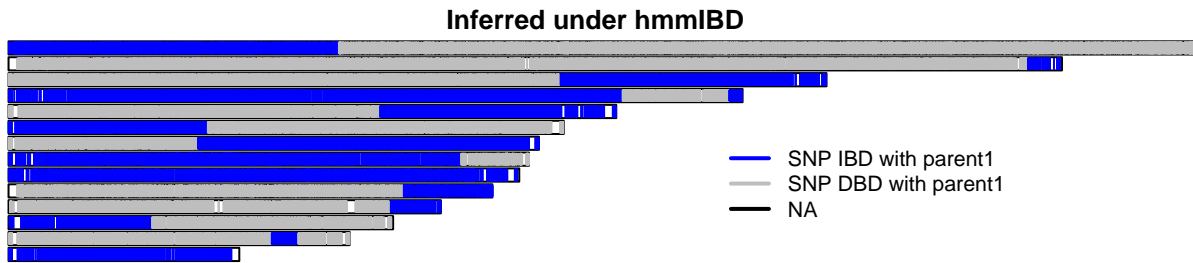

## Estimates of numbers of generations

Both methods over estimate the number of generations:

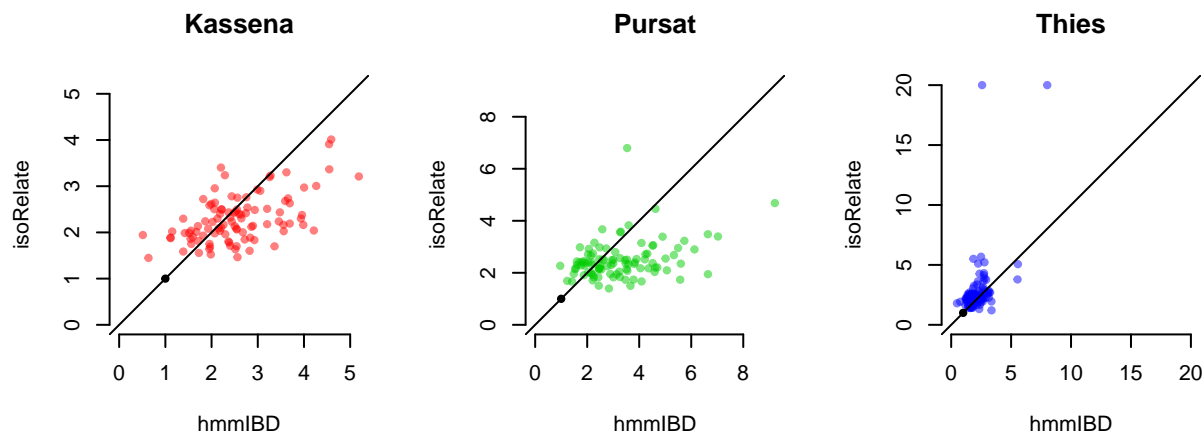

## hmmIBD posterior probability of IBD versus proportion simulated IBD

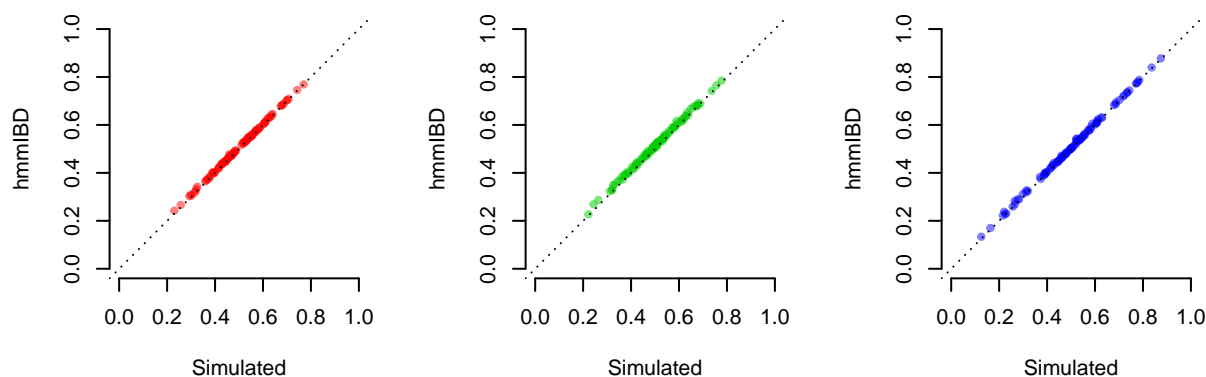

## Summary

Both isoRelate and hmmIBD are highly accurate, sensitive and specific. In addition to IBD segments, hmmIBD returns the posterior IBD proportion (a measure of relatedness that integrates over all possible IBD segment assignments). Under this present version of isoRelate, posterior proportion are not readily accessible, but many auxiliary functions for visualizing model output and assessing significance are provided. On average, hmmIBD was 25 times faster in user CPU time than isoRelate.

Table 4: Summary of average scores (standard deviations). Times correspond to 50 samples on a MacBook Air with 1.7 GHz Intel Core i7 processor.

|           | Clock time (sec)   | CPU time (sec)     | Accuracy      | Sensitivity   | Specificity   |
|-----------|--------------------|--------------------|---------------|---------------|---------------|
| isoRelate | 1711.108 (365.377) | 1652.414 (350.474) | 0.995 (0.004) | 0.999 (0.002) | 0.991 (0.008) |
| hmmIBD    | 66.695 (11.842)    | 65.94 (12.116)     | 0.993 (0.005) | 0.999 (0.001) | 0.986 (0.011) |
